# Supplementary material for: Bulk and molecular-level composition of primary organic aerosol from wood, straw, cow dung, and plastic burning
Source: Copernicus journal article supplement (doi:10.5194/acp-23-14561-2023), 2023-11-24
Supplement: Supplementary file 1 [file acp-23-14561-2023-supplement.pdf]

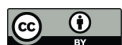

*Supplement of*

## **Bulk and molecular-level composition of primary organic aerosol from wood, straw, cow dung, and plastic burning**

**Jun Zhang et al.**

*Correspondence to:* Andre S. H. Prevot ([andre.prevot@psi.ch](mailto:andre.prevot@psi.ch)) and David M. Bell ([david.bell@psi.ch](mailto:david.bell@psi.ch))

The copyright of individual parts of the supplement might differ from the article licence.

1 **Plastic bags burning emission correction.** In three out of four plastic bags burning experiments, the mass spectrum  
 2 at the middle to end burning stages had considerable  $C_xH_yO_z$  family contribution ( $\sim 23\%$ ). It is unlikely from the plastic  
 3 bags, given the fact that polyethylene is the main component of plastic bags, but from the emission of other fuels  
 4 remaining in the chimney. As the combustion progressed, the chimney was heated, and the volatile substances  
 5 remaining on the chimney evaporated and were then partitioned to the particles for detection. However, at the early  
 6 stage, before the chimney got hot, the mass spectra consisted mainly of hydrocarbons (see Figure S2a). Therefore, we  
 7 take only the early burning stage of these three burning experiments into account for the average mass spectrum in  
 8 Figure 1(f). The absolute concentration of the three AMS mass spectra derived from the early-stage burning is scaled  
 9 to the uncontaminated burning experiment ions based on  $m/z$  81 and  $m/z$  83, which are stable and characteristic for  
 10 hydrocarbons. The difference on average is  $0.4\% \pm 1.0\%$  which is very minor as shown in Figure S2 b. The mass  
 11 spectra of three contaminated burning over the whole burning stages indicate that the measured organics was  $14.6\%$   
 12  $\pm 8.7\%$  overestimated. Correspondingly, the emission factors for PM and OM are corrected for each plastic bags  
 13 burning.

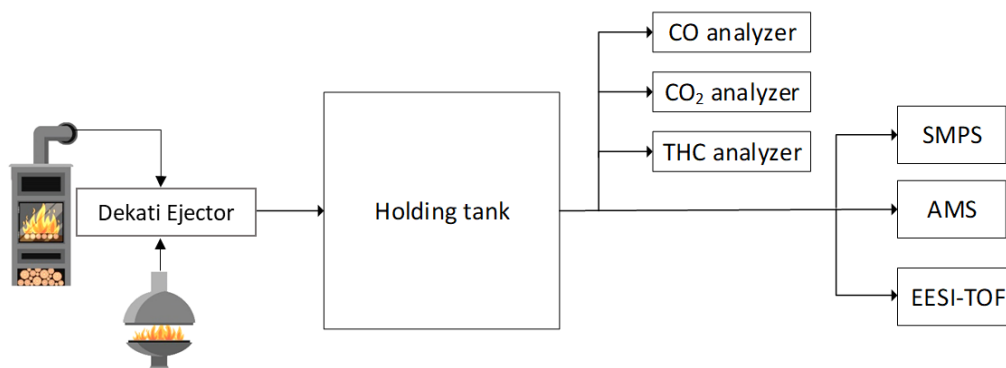

14  
 15 **Figure S1. Schematic diagram of experimental setup.**

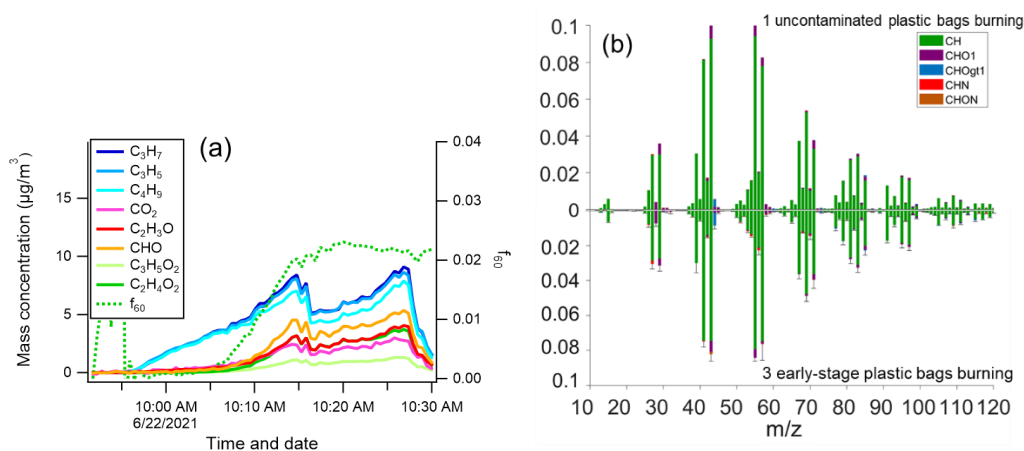

16  
 17 **Figure S2 (a) The time series of some ions measured by the AMS during the plastic bags burning for the contaminated case;**  
 18 **(b) the mass spectrum comparison of uncontaminated plastic bags burning experiment at the top v.s. the average of 3 early-**  
 19 **stage burning at the bottom.**

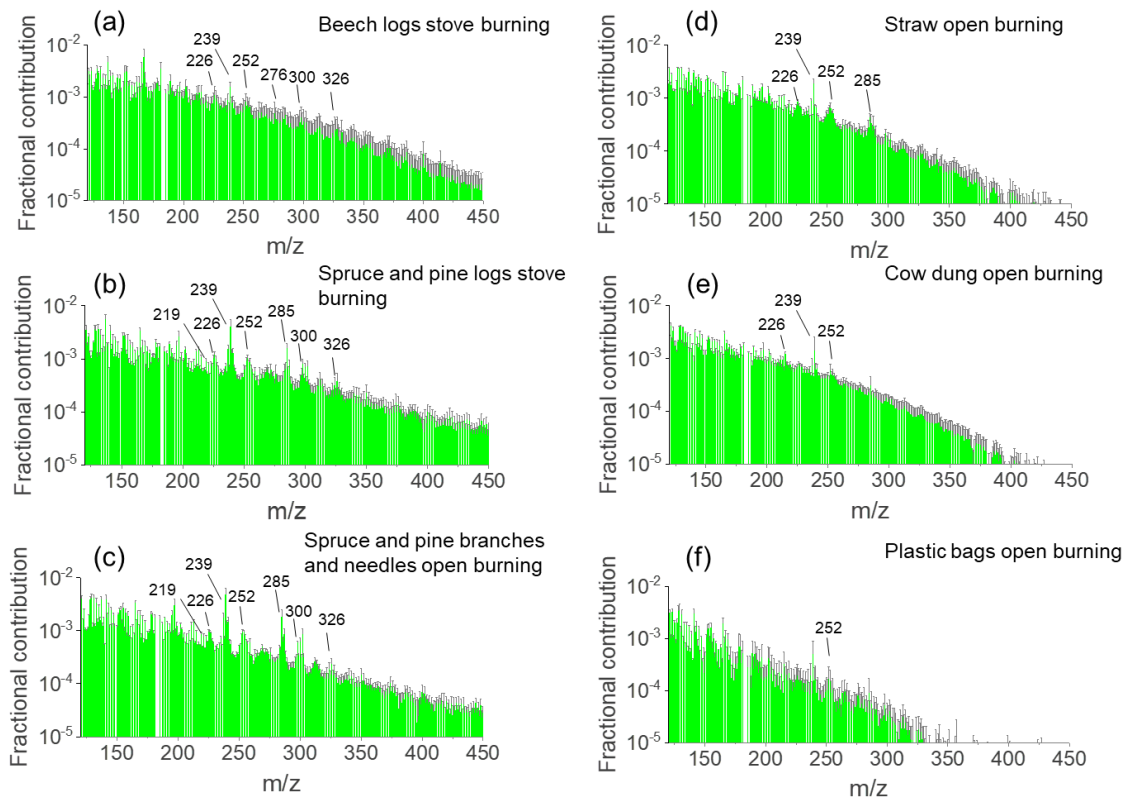

20

21 **Figure S3.** Average AMS POA mass spectral profiles in the range from  $m/z$  120 to 450 of (a) beech logs stove burning ( $n=6$ ;  
 22  $n$  is the number of experiments), (b) spruce and pine logs stove burning ( $n=9$ ), (c) spruce and pine branches and needles  
 23 open burning ( $n=4$ ), (d) straw open burning ( $n=6$ ), (e) cow dung open burning ( $n=5$ ), and (f) plastic bags open burning ( $n=4$ ).  
 24 The  $m/z$  for some ions are marked in the figure. The error bar denotes half standard deviation in grey.

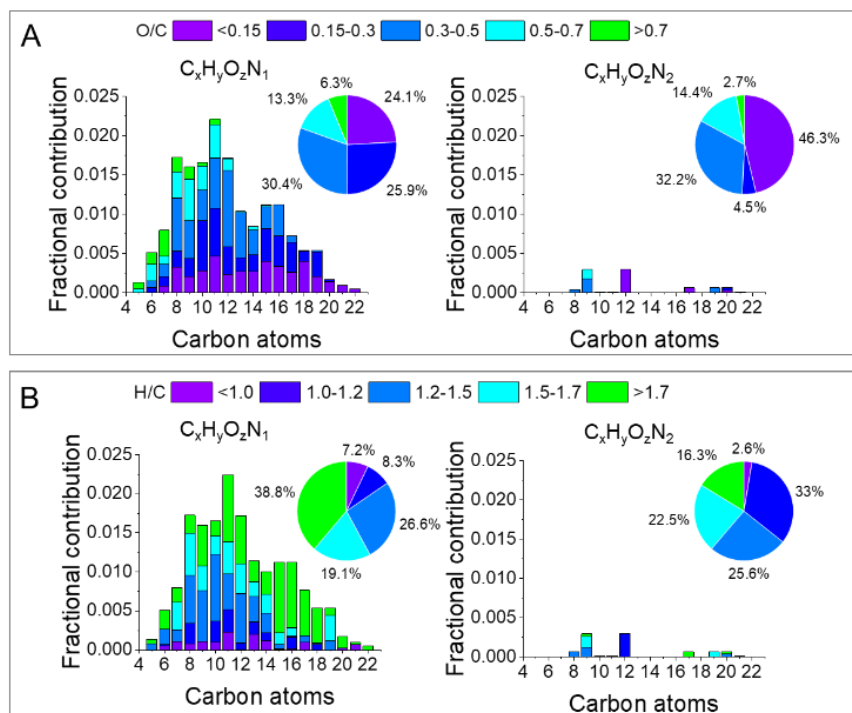

25

26 **Figure S4. The average carbon and oxygen distribution of cow dung open burning.**

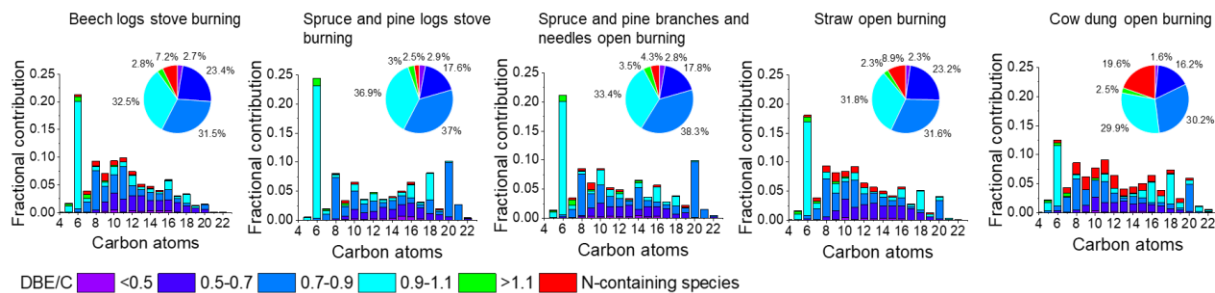

27  $DBE/C < 0.5$   $0.5-0.7$   $0.7-0.9$   $0.9-1.1$   $>1.1$  N-containing species

28 **Figure S5. The average carbon and oxygen distribution colored by the DBE/C for non-nitrogen-containing species with the**  
 29 **EESI-TOF. The nitrogen-containing species are colored in red. The pie charts are the corresponding contribution of DBE/C.**

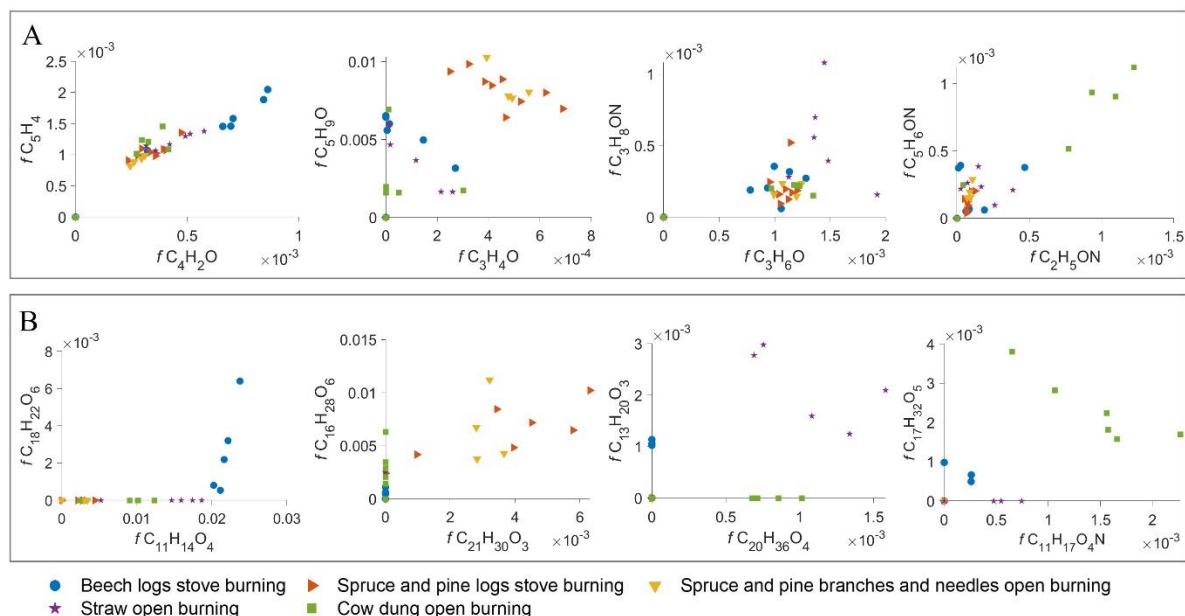

30 ● Beech logs stove burning ▲ Spruce and pine logs stove burning ▼ Spruce and pine branches and needles open burning  
 ★ Straw open burning ■ Cow dung open burning

31 **Figure S6. The scatter plots of marker ions from (A) AMS and (B) EESI-TOF.**

32 **Table S1. The emission factors of CO, CO<sub>2</sub>, THC, PM, and BC as well as MCE values from each burns. It is noted as n.a.**  
 33 **where the data is not available. The short dash line denotes the corresponding value is not calculated under the category**  
 34 **due to a lack of required data. BS, SPS, SPO, SO, CDO, PBO indicate beech wood stove burning, spruce and pine logs stove**  
 35 **burning, spruce and pine branches and needles open burning, straw open burning, and cow dung open burning, respectively.**

| Exp. No. | Burning type | MCE  | Emission factors |                 |      |                          |     |      |                      |     |      |
|----------|--------------|------|------------------|-----------------|------|--------------------------|-----|------|----------------------|-----|------|
|          |              |      | CO               | CO <sub>2</sub> | THC  | BC data is not available |     |      | BC data is available |     |      |
|          |              |      |                  |                 |      | PM                       | OM  | BC   | PM                   | OM  | BC   |
| BS1      | beech stove  | 0.94 | 65.6             | 1525.1          | 14.9 | 5.4                      | 3.1 | n.a. | -                    | -   | -    |
| BS2      | beech stove  | 0.94 | 58.5             | 1541.5          | 13.2 | 5.3                      | 3.5 | n.a. | -                    | -   | -    |
| BS3      | beech stove  | 0.91 | 89.0             | 1459.4          | 20.7 | 14.0                     | 5.3 | -    | 9.6                  | 8.3 | 3.28 |
| BS4      | beech stove  | 0.88 | 124.3            | 1388.4          | 27.3 | 12.0                     | 4.6 | -    | 8.2                  | 7.1 | 2.57 |
| BS5      | beech stove  | 0.91 | 91.8             | 1420.3          | 20.4 | -                        | -   | -    | 9.7                  | 9.3 | 1.44 |
| SPS1     | spruce stove | 0.90 | 56.7             | 1698.3          | 10.3 | 6.3                      | 2.3 | n.a. | -                    | -   | -    |
| SPS2     | spruce stove | 0.92 | 71.9             | 1661.1          | 15.9 | 4.3                      | 1.6 | n.a. | -                    | -   | -    |

|      |                    |      |       |        |      |      |      |      |      |      |      |
|------|--------------------|------|-------|--------|------|------|------|------|------|------|------|
| SPS3 | spruce stove       | 0.90 | 98.3  | 1618.4 | 17.5 | 2.6  | 1.1  | n.a. | -    | -    | -    |
| SPS4 | spruce stove       | 0.92 | 72.8  | 1650.8 | 19.3 | 3.6  | 2.2  | n.a. | -    | -    | -    |
| SPS5 | spruce stove       | 0.87 | 142.2 | 1509.2 | 25.8 | 9.2  | 4.8  | n.a. | -    | -    | -    |
| SPS6 | spruce stove       | 0.93 | 76.1  | 1658.6 | 13.9 | 5.9  | 1.1  | n.a. | -    | -    | -    |
| SPS7 | spruce stove       | 0.94 | 66.5  | 1680.3 | 12.7 | 4.0  | 1.8  | n.a. | -    | -    | -    |
| SPS8 | spruce stove       | 0.91 | 85.9  | 1649.1 | 13.5 | 3.2  | 0.9  | n.a. | -    | -    | -    |
| SPO1 | spruce + pine open | 0.95 | 54.2  | 1707.9 | 9.1  | 5.4  | 2.3  | n.a. | -    | -    | -    |
| SPO2 | spruce + pine open | 0.91 | 64.6  | 1658.6 | 16.2 | 10.4 | 4.3  | n.a. | -    | -    | -    |
| SPO3 | spruce + pine open | 0.91 | 70.5  | 1647.6 | 15.9 | 11.6 | 3.6  | n.a. | -    | -    | -    |
| SPO4 | spruce + pine open | 0.93 | 64.6  | 1661.5 | 15.3 | 10.4 | 4.9  | n.a. | -    | -    | -    |
| SO1  | straw open         | 0.92 | 40.6  | 1554.5 | 8.3  | 2.8  | 0.9  | n.a. | -    | -    | -    |
| SO2  | straw open         | 0.94 | 61.7  | 1433.0 | 36.6 | -    | -    | -    | 2.2  | 1.9  | 0.62 |
| SO3  | straw open         | 0.94 | 48.9  | 1481.8 | 26.0 | -    | -    | -    | 4.0  | 3.6  | 0.93 |
| SO4  | straw open         | 1.00 | 0.2   | 1636.4 | 0.7  | 1.6  | 1.7  | n.a. | -    | -    | -    |
| SO5  | straw open         | 0.98 | 17.8  | 1598.6 | 3.9  | 1.7  | 1.6  | n.a. | -    | -    | -    |
| SO6  | straw open         | 0.89 | 97.4  | 1366.1 | 39.3 | -    | -    | -    | 4.6  | 4.3  | 0.54 |
| CDO1 | cow dung open      | 0.81 | 79.0  | 1414.7 | 29.4 | 8.0  | 7.6  | n.a. | -    | -    | -    |
| CDO2 | cow dung open      | 0.89 | 53.0  | 1448.9 | 24.9 | 14.3 | 16.2 | -    | 14.9 | 14.2 | 0.56 |
| CDO3 | cow dung open      | 0.88 | 81.8  | 1436.9 | 22.6 | 4.9  | 5.9  | -    | 5.1  | 4.8  | 0.81 |
| CDO4 | cow dung open      | 0.90 | 99.1  | 1377.4 | 26.5 | -    | -    | -    | 12.6 | 12.5 | 0.5  |
| CDO5 | cow dung open      | 0.89 | 107.6 | 1292.2 | 32.6 | -    | -    | -    | 33.0 | 32.5 | 1.3  |
| CDO6 | cow dung open      | 0.85 | 133.0 | 1227.2 | 46.1 | -    | -    | -    | 26.2 | 25.9 | 0.76 |
| PBO1 | plastic bag open   | 0.99 | 6.2   | 3022.2 | 2.9  | 3.09 | n.a. | -    | 3.85 | n.a. | 0.89 |
| PBO2 | plastic bag open   | 0.99 | 13.1  | 3028.9 | 5.6  | 1.22 | 1.44 | -    | 1.20 | 0.92 | 0.88 |
| PBO3 | plastic bag open   | 0.99 | 10.0  | 3026.9 | 3.2  | -    | -    | -    | 2.54 | 1.34 | 0.72 |
| PBO4 | plastic bag open   | 0.95 | 88.0  | 2748.4 | 61.1 | -    | -    | -    | 3.40 | n.a. | 1.43 |

36 **Table S2. The compounds from EESI-TOF with p-value smaller than 0.1 during pairwise comparisons and their fold**  
37 **changes measured by EESI-TOF. The average p-value (p\_mean), the standard deviation of p-values (p\_std), the average**  
38 **base-2 logarithmic fold change (log2FC\_mean), and the standard deviation of log2FC (log2FC\_std) are listed.**

| Burning types            | Monoisotopic mass                              | Formula                                          | p_mean | p_std | log <sub>2</sub> FC_mean | log <sub>2</sub> FC_std |
|--------------------------|------------------------------------------------|--------------------------------------------------|--------|-------|--------------------------|-------------------------|
| Beech logs stove burning | 181.1103                                       | C <sub>10</sub> H <sub>15</sub> O <sub>2</sub> N | 0.06   | 0.05  | -1.06                    | 1.12                    |
|                          | 210.0893                                       | C <sub>11</sub> H <sub>14</sub> O <sub>4</sub>   | 0.01   | 0.00  | 1.48                     | 0.41                    |
|                          | 252.1727                                       | C <sub>15</sub> H <sub>24</sub> O <sub>3</sub>   | 0.04   | 0.01  | 3.10                     | 1.89                    |
|                          | 261.1213                                       | C <sub>11</sub> H <sub>19</sub> O <sub>6</sub> N | 0.03   | 0.03  | -0.54                    | 1.28                    |
|                          | 300.2666                                       | C <sub>18</sub> H <sub>36</sub> O <sub>3</sub>   | 0.05   | 0.06  | -1.82                    | 1.49                    |
|                          | 306.2560                                       | C <sub>20</sub> H <sub>34</sub> O <sub>2</sub>   | 0.03   | 0.03  | -3.28                    | 1.79                    |
|                          | 310.2145                                       | C <sub>18</sub> H <sub>30</sub> O <sub>4</sub>   | 0.07   | 0.03  | -1.13                    | 1.46                    |
|                          | 324.2666                                       | C <sub>20</sub> H <sub>36</sub> O <sub>3</sub>   | 0.02   | 0.01  | -3.19                    | 0.00                    |
| 334.1417                 | C <sub>18</sub> H <sub>22</sub> O <sub>6</sub> | 0.04                                             | 0.01   | 3.38  | 2.33                     |                         |
| Spruce and pine burning  | 116.1202                                       | C <sub>7</sub> H <sub>16</sub> O                 | 0.02   | 0.02  | -2.81                    | 0.00                    |
|                          | 124.0889                                       | C <sub>8</sub> H <sub>12</sub> O                 | 0.05   | 0.04  | -2.30                    | 0.75                    |
|                          | 127.0634                                       | C <sub>6</sub> H <sub>9</sub> O <sub>2</sub> N   | 0.03   | 0.01  | -1.37                    | 0.00                    |
|                          | 132.0423                                       | C <sub>5</sub> H <sub>8</sub> O <sub>4</sub>     | 0.00   | 0.00  | -1.27                    | 0.68                    |
|                          | 133.0528                                       | C <sub>8</sub> H <sub>7</sub> ON                 | 0.02   | 0.02  | -2.19                    | 0.40                    |
| 134.0579                 | C <sub>5</sub> H <sub>10</sub> O <sub>4</sub>  | 0.02                                             | 0.03   | -1.53 | 1.66                     |                         |

|          |                                                  |      |      |       |      |
|----------|--------------------------------------------------|------|------|-------|------|
| 137.0841 | C <sub>8</sub> H <sub>11</sub> ON                | 0.01 | 0.02 | -2.78 | 0.27 |
| 139.0998 | C <sub>8</sub> H <sub>13</sub> ON                | 0.04 | 0.05 | -2.17 | 0.57 |
| 140.0474 | C <sub>7</sub> H <sub>8</sub> O <sub>3</sub>     | 0.04 | 0.03 | -1.82 | 1.11 |
| 141.0790 | C <sub>7</sub> H <sub>11</sub> O <sub>2</sub> N  | 0.02 | 0.02 | -1.86 | 0.33 |
| 141.1154 | C <sub>8</sub> H <sub>15</sub> ON                | 0.02 | 0.02 | -1.94 | 0.00 |
| 148.0525 | C <sub>9</sub> H <sub>8</sub> O <sub>2</sub>     | 0.03 | 0.00 | -2.44 | 1.54 |
| 151.0634 | C <sub>8</sub> H <sub>9</sub> O <sub>2</sub> N   | 0.02 | 0.02 | -1.99 | 0.00 |
| 152.0474 | C <sub>8</sub> H <sub>8</sub> O <sub>3</sub>     | 0.03 | 0.02 | -2.58 | 1.81 |
| 153.0790 | C <sub>8</sub> H <sub>11</sub> O <sub>2</sub> N  | 0.01 | 0.02 | -2.83 | 0.00 |
| 154.0630 | C <sub>8</sub> H <sub>10</sub> O <sub>3</sub>    | 0.02 | 0.03 | -3.09 | 1.39 |
| 155.0583 | C <sub>7</sub> H <sub>9</sub> O <sub>3</sub> N   | 0.02 | 0.02 | -2.53 | 0.00 |
| 157.0892 | C <sub>11</sub> H <sub>11</sub> N                | 0.02 | 0.03 | -2.29 | 0.00 |
| 164.0474 | C <sub>9</sub> H <sub>8</sub> O <sub>3</sub>     | 0.02 | 0.01 | -1.24 | 0.78 |
| 167.0947 | C <sub>9</sub> H <sub>13</sub> O <sub>2</sub> N  | 0.02 | 0.02 | -2.69 | 0.00 |
| 168.0423 | C <sub>8</sub> H <sub>8</sub> O <sub>4</sub>     | 0.00 | 0.01 | -1.88 | 1.57 |
| 168.0787 | C <sub>9</sub> H <sub>12</sub> O <sub>3</sub>    | 0.03 | 0.02 | -3.09 | 2.13 |
| 169.0739 | C <sub>8</sub> H <sub>11</sub> O <sub>3</sub> N  | 0.02 | 0.02 | -3.15 | 0.68 |
| 173.0688 | C <sub>7</sub> H <sub>11</sub> O <sub>4</sub> N  | 0.03 | 0.01 | -2.10 | 0.00 |
| 174.0529 | C <sub>7</sub> H <sub>10</sub> O <sub>5</sub>    | 0.01 | 0.01 | -1.96 | 0.92 |
| 175.0481 | C <sub>6</sub> H <sub>9</sub> O <sub>5</sub> N   | 0.04 | 0.01 | -2.77 | 0.00 |
| 176.0838 | C <sub>11</sub> H <sub>12</sub> O <sub>2</sub>   | 0.04 | 0.05 | -2.69 | 2.19 |
| 178.0266 | C <sub>9</sub> H <sub>6</sub> O <sub>4</sub>     | 0.01 | 0.01 | 1.04  | 1.08 |
| 180.0787 | C <sub>10</sub> H <sub>12</sub> O <sub>3</sub>   | 0.04 | 0.02 | -2.50 | 2.73 |
| 181.1103 | C <sub>10</sub> H <sub>15</sub> O <sub>2</sub> N | 0.01 | 0.02 | -2.79 | 0.00 |
| 182.0944 | C <sub>10</sub> H <sub>14</sub> O <sub>3</sub>   | 0.03 | 0.01 | -2.09 | 2.31 |
| 183.0532 | C <sub>8</sub> H <sub>9</sub> O <sub>4</sub> N   | 0.03 | 0.01 | -2.50 | 0.00 |
| 183.1049 | C <sub>13</sub> H <sub>13</sub> N                | 0.02 | 0.02 | -3.38 | 0.00 |
| 185.0688 | C <sub>8</sub> H <sub>11</sub> O <sub>4</sub> N  | 0.01 | 0.02 | -3.46 | 0.54 |
| 188.0321 | C <sub>7</sub> H <sub>8</sub> O <sub>6</sub>     | 0.04 | 0.05 | 0.09  | 0.46 |
| 188.0838 | C <sub>12</sub> H <sub>12</sub> O <sub>2</sub>   | 0.04 | 0.01 | -2.54 | 2.12 |
| 189.0790 | C <sub>11</sub> H <sub>11</sub> O <sub>2</sub> N | 0.01 | 0.02 | -2.83 | 0.00 |
| 190.0842 | C <sub>8</sub> H <sub>14</sub> O <sub>5</sub>    | 0.04 | 0.04 | -2.39 | 2.16 |
| 191.0794 | C <sub>7</sub> H <sub>13</sub> O <sub>5</sub> N  | 0.04 | 0.01 | -2.13 | 0.00 |
| 191.0947 | C <sub>11</sub> H <sub>13</sub> O <sub>2</sub> N | 0.02 | 0.02 | -2.56 | 0.00 |
| 192.0423 | C <sub>10</sub> H <sub>8</sub> O <sub>4</sub>    | 0.06 | 0.04 | -0.77 | 1.06 |
| 192.0787 | C <sub>11</sub> H <sub>12</sub> O <sub>3</sub>   | 0.02 | 0.03 | -1.14 | 0.77 |
| 194.0944 | C <sub>11</sub> H <sub>14</sub> O <sub>3</sub>   | 0.00 | 0.00 | -4.96 | 2.40 |
| 195.0896 | C <sub>10</sub> H <sub>13</sub> O <sub>3</sub> N | 0.02 | 0.02 | -3.40 | 0.00 |
| 195.1049 | C <sub>14</sub> H <sub>13</sub> N                | 0.02 | 0.02 | -3.21 | 0.00 |
| 196.0736 | C <sub>10</sub> H <sub>12</sub> O <sub>4</sub>   | 0.01 | 0.01 | -1.15 | 0.75 |
| 196.1100 | C <sub>11</sub> H <sub>16</sub> O <sub>3</sub>   | 0.03 | 0.02 | -2.93 | 2.31 |
| 197.0688 | C <sub>9</sub> H <sub>11</sub> O <sub>4</sub> N  | 0.02 | 0.02 | -2.73 | 0.00 |
| 197.1205 | C <sub>14</sub> H <sub>15</sub> N                | 0.03 | 0.01 | -2.26 | 0.00 |

|          |                                                              |      |      |       |      |
|----------|--------------------------------------------------------------|------|------|-------|------|
| 199.0998 | C <sub>13</sub> H <sub>13</sub> ON                           | 0.03 | 0.05 | -2.53 | 0.90 |
| 207.0896 | C <sub>11</sub> H <sub>13</sub> O <sub>3</sub> N             | 0.02 | 0.02 | -2.92 | 0.00 |
| 208.0736 | C <sub>11</sub> H <sub>12</sub> O <sub>4</sub>               | 0.01 | 0.00 | -1.38 | 1.53 |
| 208.1100 | C <sub>12</sub> H <sub>16</sub> O <sub>3</sub>               | 0.05 | 0.03 | -2.26 | 2.15 |
| 209.1053 | C <sub>11</sub> H <sub>15</sub> O <sub>3</sub> N             | 0.01 | 0.02 | -2.85 | 0.00 |
| 210.0893 | C <sub>11</sub> H <sub>14</sub> O <sub>4</sub>               | 0.00 | 0.00 | -3.99 | 2.52 |
| 211.0957 | C <sub>9</sub> H <sub>13</sub> O <sub>3</sub> N <sub>3</sub> | 0.03 | 0.01 | -3.48 | 0.00 |
| 212.0685 | C <sub>10</sub> H <sub>12</sub> O <sub>5</sub>               | 0.00 | 0.00 | -2.97 | 1.77 |
| 213.1366 | C <sub>11</sub> H <sub>19</sub> O <sub>3</sub> N             | 0.02 | 0.02 | -2.72 | 0.00 |
| 216.1151 | C <sub>14</sub> H <sub>16</sub> O <sub>2</sub>               | 0.04 | 0.03 | -3.58 | 1.15 |
| 217.0951 | C <sub>9</sub> H <sub>15</sub> O <sub>5</sub> N              | 0.04 | 0.01 | -2.59 | 0.00 |
| 217.1216 | C <sub>12</sub> H <sub>15</sub> ON <sub>3</sub>              | 0.02 | 0.02 | -3.12 | 0.00 |
| 219.0743 | C <sub>8</sub> H <sub>13</sub> O <sub>6</sub> N              | 0.03 | 0.01 | -2.71 | 0.89 |
| 220.1100 | C <sub>13</sub> H <sub>16</sub> O <sub>3</sub>               | 0.03 | 0.03 | -3.26 | 2.37 |
| 221.1012 | C <sub>7</sub> H <sub>15</sub> O <sub>5</sub> N <sub>3</sub> | 0.02 | 0.02 | -3.21 | 0.00 |
| 225.1002 | C <sub>11</sub> H <sub>15</sub> O <sub>4</sub> N             | 0.03 | 0.01 | -2.60 | 0.00 |
| 225.1366 | C <sub>12</sub> H <sub>19</sub> O <sub>3</sub> N             | 0.03 | 0.01 | -2.27 | 0.55 |
| 227.0794 | C <sub>10</sub> H <sub>13</sub> O <sub>5</sub> N             | 0.02 | 0.02 | -2.50 | 0.00 |
| 228.1151 | C <sub>15</sub> H <sub>16</sub> O <sub>2</sub>               | 0.05 | 0.03 | -2.71 | 1.89 |
| 228.2091 | C <sub>14</sub> H <sub>28</sub> O <sub>2</sub>               | 0.03 | 0.01 | -3.47 | 0.00 |
| 232.1464 | C <sub>15</sub> H <sub>20</sub> O <sub>2</sub>               | 0.02 | 0.02 | -3.48 | 0.00 |
| 233.1264 | C <sub>10</sub> H <sub>19</sub> O <sub>5</sub> N             | 0.02 | 0.02 | -2.88 | 0.00 |
| 234.1104 | C <sub>10</sub> H <sub>18</sub> O <sub>6</sub>               | 0.01 | 0.01 | 2.20  | 1.79 |
| 235.1056 | C <sub>9</sub> H <sub>17</sub> O <sub>6</sub> N              | 0.02 | 0.02 | -2.89 | 0.00 |
| 235.1362 | C <sub>17</sub> H <sub>17</sub> N                            | 0.04 | 0.01 | -2.16 | 0.00 |
| 239.1370 | C <sub>9</sub> H <sub>21</sub> O <sub>6</sub> N              | 0.02 | 0.02 | -3.31 | 0.00 |
| 241.1315 | C <sub>12</sub> H <sub>19</sub> O <sub>4</sub> N             | 0.02 | 0.02 | -2.91 | 0.00 |
| 242.2247 | C <sub>15</sub> H <sub>30</sub> O <sub>2</sub>               | 0.02 | 0.02 | -3.78 | 0.00 |
| 243.1471 | C <sub>12</sub> H <sub>21</sub> O <sub>4</sub> N             | 0.02 | 0.02 | -3.24 | 0.00 |
| 253.2043 | C <sub>15</sub> H <sub>27</sub> O <sub>2</sub> N             | 0.02 | 0.02 | -2.34 | 0.00 |
| 254.1155 | C <sub>13</sub> H <sub>18</sub> O <sub>5</sub>               | 0.00 | 0.00 | -2.48 | 1.99 |
| 254.1366 | C <sub>10</sub> H <sub>22</sub> O <sub>7</sub>               | 0.05 | 0.02 | -2.54 | 0.77 |
| 256.0583 | C <sub>11</sub> H <sub>12</sub> O <sub>7</sub>               | 0.01 | 0.00 | 2.61  | 1.79 |
| 256.2404 | C <sub>16</sub> H <sub>32</sub> O <sub>2</sub>               | 0.02 | 0.04 | -5.60 | 1.18 |
| 258.1621 | C <sub>17</sub> H <sub>22</sub> O <sub>2</sub>               | 0.03 | 0.02 | 2.29  | 2.10 |
| 259.1421 | C <sub>12</sub> H <sub>21</sub> O <sub>5</sub> N             | 0.02 | 0.02 | -2.56 | 0.00 |
| 261.1213 | C <sub>11</sub> H <sub>19</sub> O <sub>6</sub> N             | 0.03 | 0.05 | -2.40 | 1.38 |
| 268.1676 | C <sub>15</sub> H <sub>24</sub> O <sub>4</sub>               | 0.01 | 0.00 | 1.86  | 1.51 |
| 269.1628 | C <sub>14</sub> H <sub>23</sub> O <sub>4</sub> N             | 0.02 | 0.02 | -2.85 | 0.00 |
| 270.0740 | C <sub>12</sub> H <sub>14</sub> O <sub>7</sub>               | 0.05 | 0.01 | 2.13  | 1.87 |
| 272.2353 | C <sub>16</sub> H <sub>32</sub> O <sub>3</sub>               | 0.01 | 0.02 | -3.50 | 0.00 |
| 284.0897 | C <sub>13</sub> H <sub>16</sub> O <sub>7</sub>               | 0.05 | 0.03 | 1.49  | 1.63 |
| 284.1777 | C <sub>19</sub> H <sub>24</sub> O <sub>2</sub>               | 0.03 | 0.03 | 1.45  | 1.73 |

|                          |                                                  |                                                  |      |       |       |      |
|--------------------------|--------------------------------------------------|--------------------------------------------------|------|-------|-------|------|
| 286.1934                 | C <sub>19</sub> H <sub>26</sub> O <sub>2</sub>   | 0.03                                             | 0.02 | 2.70  | 2.45  |      |
| 288.1727                 | C <sub>18</sub> H <sub>24</sub> O <sub>3</sub>   | 0.06                                             | 0.04 | 1.40  | 1.84  |      |
| 298.1053                 | C <sub>14</sub> H <sub>18</sub> O <sub>7</sub>   | 0.04                                             | 0.04 | 1.62  | 1.69  |      |
| 299.2462                 | C <sub>17</sub> H <sub>33</sub> O <sub>3</sub> N | 0.04                                             | 0.01 | -2.66 | 0.00  |      |
| 299.2826                 | C <sub>18</sub> H <sub>37</sub> O <sub>2</sub> N | 0.03                                             | 0.01 | -1.77 | 0.00  |      |
| 300.2666                 | C <sub>18</sub> H <sub>36</sub> O <sub>3</sub>   | 0.03                                             | 0.06 | -3.48 | 1.00  |      |
| 303.2047                 | C <sub>15</sub> H <sub>29</sub> O <sub>5</sub> N | 0.03                                             | 0.01 | -3.20 | 0.00  |      |
| 303.2411                 | C <sub>16</sub> H <sub>33</sub> O <sub>4</sub> N | 0.04                                             | 0.01 | -3.51 | 0.00  |      |
| 306.2560                 | C <sub>20</sub> H <sub>34</sub> O <sub>2</sub>   | 0.02                                             | 0.02 | 1.11  | 1.86  |      |
| 310.2145                 | C <sub>18</sub> H <sub>30</sub> O <sub>4</sub>   | 0.01                                             | 0.02 | -3.24 | 0.00  |      |
| 312.2091                 | C <sub>21</sub> H <sub>28</sub> O <sub>2</sub>   | 0.00                                             | 0.00 | 2.90  | 1.67  |      |
| 314.2247                 | C <sub>21</sub> H <sub>30</sub> O <sub>2</sub>   | 0.03                                             | 0.01 | 2.41  | 2.65  |      |
| 314.2459                 | C <sub>18</sub> H <sub>34</sub> O <sub>4</sub>   | 0.05                                             | 0.05 | -3.17 | 1.04  |      |
| 316.1887                 | C <sub>16</sub> H <sub>28</sub> O <sub>6</sub>   | 0.00                                             | 0.00 | 2.07  | 0.66  |      |
| 318.2196                 | C <sub>20</sub> H <sub>30</sub> O <sub>3</sub>   | 0.03                                             | 0.03 | 1.56  | 0.77  |      |
| 320.2353                 | C <sub>20</sub> H <sub>32</sub> O <sub>3</sub>   | 0.03                                             | 0.05 | 1.65  | 2.16  |      |
| 328.2251                 | C <sub>18</sub> H <sub>32</sub> O <sub>5</sub>   | 0.04                                             | 0.01 | -2.85 | 0.00  |      |
| 330.2196                 | C <sub>21</sub> H <sub>30</sub> O <sub>3</sub>   | 0.00                                             | 0.00 | 4.67  | 1.69  |      |
| 332.2353                 | C <sub>21</sub> H <sub>32</sub> O <sub>3</sub>   | 0.01                                             | 0.00 | 2.65  | 2.72  |      |
| 333.2153                 | C <sub>16</sub> H <sub>31</sub> O <sub>6</sub> N | 0.00                                             | 0.00 | 2.74  | 0.57  |      |
| 356.1836                 | C <sub>18</sub> H <sub>28</sub> O <sub>7</sub>   | 0.01                                             | 0.00 | 3.44  | 1.81  |      |
| 362.2459                 | C <sub>22</sub> H <sub>34</sub> O <sub>4</sub>   | 0.02                                             | 0.01 | 2.37  | 2.13  |      |
| <hr/>                    |                                                  |                                                  |      |       |       |      |
| Straw open<br>burning    | 178.0266                                         | C <sub>9</sub> H <sub>6</sub> O <sub>4</sub>     | 0.02 | 0.01  | -0.03 | 0.24 |
|                          | 181.1103                                         | C <sub>10</sub> H <sub>15</sub> O <sub>2</sub> N | 0.05 | 0.04  | -0.09 | 1.17 |
|                          | 190.1206                                         | C <sub>9</sub> H <sub>18</sub> O <sub>4</sub>    | 0.07 | 0.03  | 1.12  | 2.48 |
|                          | 224.1413                                         | C <sub>13</sub> H <sub>20</sub> O <sub>3</sub>   | 0.01 | 0.00  | 2.80  | 0.50 |
|                          | 232.1100                                         | C <sub>14</sub> H <sub>16</sub> O <sub>3</sub>   | 0.02 | 0.01  | 0.65  | 0.22 |
|                          | 238.1206                                         | C <sub>13</sub> H <sub>18</sub> O <sub>4</sub>   | 0.01 | 0.01  | 1.87  | 0.40 |
|                          | 272.1625                                         | C <sub>14</sub> H <sub>24</sub> O <sub>5</sub>   | 0.04 | 0.05  | 2.60  | 1.82 |
|                          | 283.1056                                         | C <sub>13</sub> H <sub>17</sub> O <sub>6</sub> N | 0.03 | 0.02  | 1.82  | 1.09 |
|                          | 340.2615                                         | C <sub>20</sub> H <sub>36</sub> O <sub>4</sub>   | 0.03 | 0.04  | 2.20  | 0.47 |
| <hr/>                    |                                                  |                                                  |      |       |       |      |
| Cow dung open<br>burning | 114.1045                                         | C <sub>7</sub> H <sub>14</sub> O                 | 0.04 | 0.04  | 1.47  | 1.16 |
|                          | 116.1202                                         | C <sub>7</sub> H <sub>16</sub> O                 | 0.00 | 0.00  | 2.59  | 0.73 |
|                          | 137.0841                                         | C <sub>8</sub> H <sub>11</sub> ON                | 0.02 | 0.02  | 2.16  | 0.96 |
|                          | 139.0634                                         | C <sub>7</sub> H <sub>9</sub> O <sub>2</sub> N   | 0.03 | 0.02  | 1.46  | 0.94 |
|                          | 139.0998                                         | C <sub>8</sub> H <sub>13</sub> ON                | 0.02 | 0.02  | 1.93  | 0.91 |
|                          | 141.0790                                         | C <sub>7</sub> H <sub>11</sub> O <sub>2</sub> N  | 0.02 | 0.02  | 1.62  | 0.60 |
|                          | 141.1154                                         | C <sub>8</sub> H <sub>15</sub> ON                | 0.04 | 0.04  | 1.55  | 1.23 |
|                          | 143.1311                                         | C <sub>8</sub> H <sub>17</sub> ON                | 0.06 | 0.05  | 1.58  | 1.37 |
|                          | 149.0841                                         | C <sub>9</sub> H <sub>11</sub> ON                | 0.02 | 0.01  | 2.77  | 1.62 |
|                          | 153.0790                                         | C <sub>8</sub> H <sub>11</sub> O <sub>2</sub> N  | 0.04 | 0.04  | 1.94  | 1.04 |
|                          | 153.1154                                         | C <sub>9</sub> H <sub>15</sub> ON                | 0.03 | 0.04  | 1.80  | 0.95 |
|                          | 158.1672                                         | C <sub>10</sub> H <sub>22</sub> O                | 0.02 | 0.02  | 2.70  | 1.74 |



|          |                                                               |      |      |       |      |
|----------|---------------------------------------------------------------|------|------|-------|------|
| 165.0790 | C <sub>9</sub> H <sub>11</sub> O <sub>2</sub> N               | 0.00 | 0.00 | 3.06  | 0.87 |
| 165.1154 | C <sub>10</sub> H <sub>15</sub> ON                            | 0.00 | 0.00 | 3.27  | 0.89 |
| 167.0947 | C <sub>9</sub> H <sub>13</sub> O <sub>2</sub> N               | 0.02 | 0.02 | 1.92  | 0.82 |
| 167.1311 | C <sub>10</sub> H <sub>17</sub> ON                            | 0.02 | 0.01 | 2.70  | 1.45 |
| 175.0634 | C <sub>10</sub> H <sub>9</sub> O <sub>2</sub> N               | 0.06 | 0.05 | 2.16  | 1.71 |
| 175.0998 | C <sub>11</sub> H <sub>13</sub> ON                            | 0.06 | 0.05 | 2.49  | 2.08 |
| 176.0685 | C <sub>7</sub> H <sub>12</sub> O <sub>5</sub>                 | 0.02 | 0.01 | -4.33 | 1.96 |
| 177.0790 | C <sub>10</sub> H <sub>11</sub> O <sub>2</sub> N              | 0.02 | 0.01 | 2.87  | 1.60 |
| 177.1154 | C <sub>11</sub> H <sub>15</sub> ON                            | 0.02 | 0.01 | 3.22  | 2.02 |
| 179.0947 | C <sub>10</sub> H <sub>13</sub> O <sub>2</sub> N              | 0.02 | 0.01 | 3.03  | 1.74 |
| 179.1311 | C <sub>11</sub> H <sub>17</sub> ON                            | 0.01 | 0.01 | 2.42  | 0.90 |
| 181.0852 | C <sub>8</sub> H <sub>11</sub> O <sub>2</sub> N <sub>3</sub>  | 0.02 | 0.01 | 2.90  | 1.50 |
| 181.1103 | C <sub>10</sub> H <sub>15</sub> O <sub>2</sub> N              | 0.03 | 0.03 | 2.08  | 0.95 |
| 182.0427 | C <sub>5</sub> H <sub>10</sub> O <sub>7</sub>                 | 0.07 | 0.04 | 2.37  | 2.22 |
| 185.0688 | C <sub>8</sub> H <sub>11</sub> O <sub>4</sub> N               | 0.04 | 0.04 | 2.28  | 1.15 |
| 185.1053 | C <sub>9</sub> H <sub>15</sub> O <sub>3</sub> N               | 0.01 | 0.02 | 2.53  | 0.93 |
| 189.0790 | C <sub>11</sub> H <sub>11</sub> O <sub>2</sub> N              | 0.04 | 0.03 | 1.34  | 1.47 |
| 189.1154 | C <sub>12</sub> H <sub>15</sub> ON                            | 0.02 | 0.01 | 3.18  | 1.80 |
| 193.1103 | C <sub>11</sub> H <sub>15</sub> O <sub>2</sub> N              | 0.04 | 0.04 | 1.65  | 0.89 |
| 194.0579 | C <sub>10</sub> H <sub>10</sub> O <sub>4</sub>                | 0.02 | 0.01 | -4.79 | 0.00 |
| 194.1672 | C <sub>13</sub> H <sub>22</sub> O                             | 0.06 | 0.05 | 2.53  | 2.05 |
| 195.1624 | C <sub>12</sub> H <sub>21</sub> ON                            | 0.02 | 0.01 | 2.21  | 1.18 |
| 197.1781 | C <sub>12</sub> H <sub>23</sub> ON                            | 0.02 | 0.02 | 2.11  | 1.34 |
| 199.0845 | C <sub>9</sub> H <sub>13</sub> O <sub>4</sub> N               | 0.00 | 0.00 | 2.17  | 0.71 |
| 199.0998 | C <sub>13</sub> H <sub>13</sub> ON                            | 0.05 | 0.04 | 1.21  | 1.48 |
| 201.0638 | C <sub>8</sub> H <sub>11</sub> O <sub>5</sub> N               | 0.06 | 0.05 | 1.65  | 1.63 |
| 201.1154 | C <sub>13</sub> H <sub>15</sub> ON                            | 0.06 | 0.05 | 2.33  | 1.97 |
| 207.0896 | C <sub>11</sub> H <sub>13</sub> O <sub>3</sub> N              | 0.02 | 0.02 | 1.89  | 0.57 |
| 207.1260 | C <sub>12</sub> H <sub>17</sub> O <sub>2</sub> N              | 0.00 | 0.00 | 3.74  | 0.93 |
| 208.1676 | C <sub>10</sub> H <sub>24</sub> O <sub>4</sub>                | 0.06 | 0.05 | 2.87  | 2.27 |
| 209.1053 | C <sub>11</sub> H <sub>15</sub> O <sub>3</sub> N              | 0.03 | 0.03 | 1.64  | 0.70 |
| 209.1264 | C <sub>8</sub> H <sub>19</sub> O <sub>5</sub> N               | 0.03 | 0.03 | 1.88  | 1.46 |
| 210.0893 | C <sub>11</sub> H <sub>14</sub> O <sub>4</sub>                | 0.03 | 0.04 | -0.13 | 0.88 |
| 213.1366 | C <sub>11</sub> H <sub>19</sub> O <sub>3</sub> N              | 0.03 | 0.02 | 2.08  | 1.02 |
| 223.1421 | C <sub>9</sub> H <sub>21</sub> O <sub>5</sub> N               | 0.00 | 0.00 | 2.71  | 0.70 |
| 225.1114 | C <sub>10</sub> H <sub>15</sub> O <sub>3</sub> N <sub>3</sub> | 0.06 | 0.05 | 1.98  | 1.59 |
| 225.2094 | C <sub>14</sub> H <sub>27</sub> ON                            | 0.06 | 0.05 | 2.01  | 1.60 |
| 227.0794 | C <sub>10</sub> H <sub>13</sub> O <sub>5</sub> N              | 0.02 | 0.03 | 1.80  | 0.37 |
| 227.1158 | C <sub>11</sub> H <sub>17</sub> O <sub>4</sub> N              | 0.00 | 0.00 | 2.82  | 0.57 |
| 233.1053 | C <sub>13</sub> H <sub>15</sub> O <sub>3</sub> N              | 0.02 | 0.01 | 2.86  | 1.43 |
| 236.0897 | C <sub>9</sub> H <sub>16</sub> O <sub>7</sub>                 | 0.02 | 0.02 | -3.31 | 0.00 |
| 237.1002 | C <sub>12</sub> H <sub>15</sub> O <sub>4</sub> N              | 0.02 | 0.02 | 0.90  | 0.55 |
| 238.1206 | C <sub>13</sub> H <sub>18</sub> O <sub>4</sub>                | 0.02 | 0.02 | -4.82 | 0.00 |

|          |                                                               |      |      |       |      |
|----------|---------------------------------------------------------------|------|------|-------|------|
| 241.0699 | C <sub>9</sub> H <sub>11</sub> O <sub>5</sub> N <sub>3</sub>  | 0.06 | 0.05 | 1.68  | 1.48 |
| 241.2407 | C <sub>15</sub> H <sub>31</sub> ON                            | 0.02 | 0.01 | 2.69  | 1.48 |
| 243.1471 | C <sub>12</sub> H <sub>21</sub> O <sub>4</sub> N              | 0.02 | 0.02 | 2.23  | 0.78 |
| 245.0900 | C <sub>10</sub> H <sub>15</sub> O <sub>6</sub> N              | 0.00 | 0.00 | 1.57  | 0.51 |
| 245.1264 | C <sub>11</sub> H <sub>19</sub> O <sub>5</sub> N              | 0.02 | 0.03 | 2.04  | 0.58 |
| 246.1104 | C <sub>11</sub> H <sub>18</sub> O <sub>6</sub>                | 0.01 | 0.02 | 3.12  | 0.76 |
| 246.1216 | C <sub>10</sub> H <sub>18</sub> O <sub>5</sub> N <sub>2</sub> | 0.01 | 0.01 | -4.77 | 0.00 |
| 246.1468 | C <sub>12</sub> H <sub>22</sub> O <sub>5</sub>                | 0.01 | 0.01 | 1.87  | 0.73 |
| 247.1421 | C <sub>11</sub> H <sub>21</sub> O <sub>5</sub> N              | 0.04 | 0.04 | 0.87  | 0.57 |
| 253.0951 | C <sub>12</sub> H <sub>15</sub> O <sub>5</sub> N              | 0.02 | 0.02 | 1.77  | 1.12 |
| 255.1260 | C <sub>16</sub> H <sub>17</sub> O <sub>2</sub> N              | 0.02 | 0.01 | 2.93  | 1.54 |
| 259.1421 | C <sub>12</sub> H <sub>21</sub> O <sub>5</sub> N              | 0.02 | 0.03 | 2.13  | 0.57 |
| 266.2247 | C <sub>17</sub> H <sub>30</sub> O <sub>2</sub>                | 0.02 | 0.01 | 2.01  | 1.53 |
| 267.2200 | C <sub>16</sub> H <sub>29</sub> O <sub>2</sub> N              | 0.06 | 0.05 | 1.73  | 1.39 |
| 268.0947 | C <sub>13</sub> H <sub>16</sub> O <sub>6</sub>                | 0.05 | 0.03 | -2.41 | 1.14 |
| 268.2404 | C <sub>17</sub> H <sub>32</sub> O <sub>2</sub>                | 0.02 | 0.03 | 2.10  | 0.66 |
| 269.1628 | C <sub>14</sub> H <sub>23</sub> O <sub>4</sub> N              | 0.01 | 0.02 | 2.34  | 0.80 |
| 269.2356 | C <sub>16</sub> H <sub>31</sub> O <sub>2</sub> N              | 0.04 | 0.04 | 1.75  | 1.31 |
| 269.2720 | C <sub>17</sub> H <sub>35</sub> ON                            | 0.02 | 0.01 | 2.60  | 1.50 |
| 273.1213 | C <sub>12</sub> H <sub>19</sub> O <sub>6</sub> N              | 0.00 | 0.00 | 2.50  | 0.64 |
| 280.1887 | C <sub>13</sub> H <sub>28</sub> O <sub>6</sub>                | 0.06 | 0.05 | 2.38  | 2.04 |
| 283.1632 | C <sub>11</sub> H <sub>25</sub> O <sub>7</sub> N              | 0.02 | 0.02 | 2.38  | 1.34 |
| 284.2717 | C <sub>18</sub> H <sub>36</sub> O <sub>2</sub>                | 0.01 | 0.01 | 2.42  | 0.96 |
| 285.1213 | C <sub>13</sub> H <sub>19</sub> O <sub>6</sub> N              | 0.02 | 0.01 | 2.45  | 1.31 |
| 285.1577 | C <sub>14</sub> H <sub>23</sub> O <sub>5</sub> N              | 0.00 | 0.00 | 3.05  | 0.70 |
| 285.2669 | C <sub>17</sub> H <sub>35</sub> O <sub>2</sub> N              | 0.06 | 0.05 | 1.99  | 1.60 |
| 286.2510 | C <sub>17</sub> H <sub>34</sub> O <sub>3</sub>                | 0.03 | 0.02 | 1.71  | 1.68 |
| 287.1734 | C <sub>14</sub> H <sub>25</sub> O <sub>5</sub> N              | 0.01 | 0.02 | 2.36  | 0.59 |
| 289.1526 | C <sub>13</sub> H <sub>23</sub> O <sub>6</sub> N              | 0.02 | 0.01 | 2.39  | 1.27 |
| 293.2469 | C <sub>17</sub> H <sub>31</sub> ON <sub>3</sub>               | 0.06 | 0.05 | 1.55  | 1.31 |
| 295.2149 | C <sub>17</sub> H <sub>29</sub> O <sub>3</sub> N              | 0.03 | 0.03 | 1.85  | 1.25 |
| 295.2877 | C <sub>19</sub> H <sub>37</sub> ON                            | 0.02 | 0.01 | 2.15  | 1.16 |
| 296.2717 | C <sub>19</sub> H <sub>36</sub> O <sub>2</sub>                | 0.01 | 0.02 | 1.65  | 0.38 |
| 297.1577 | C <sub>15</sub> H <sub>23</sub> O <sub>5</sub> N              | 0.02 | 0.01 | 2.74  | 1.51 |
| 299.2098 | C <sub>16</sub> H <sub>29</sub> O <sub>4</sub> N              | 0.06 | 0.05 | 1.78  | 1.52 |
| 300.2666 | C <sub>18</sub> H <sub>36</sub> O <sub>3</sub>                | 0.00 | 0.00 | 2.39  | 0.66 |
| 301.1468 | C <sub>21</sub> H <sub>19</sub> ON                            | 0.00 | 0.00 | 2.94  | 0.53 |
| 301.2254 | C <sub>16</sub> H <sub>31</sub> O <sub>4</sub> N              | 0.06 | 0.05 | 2.60  | 2.18 |
| 302.2823 | C <sub>18</sub> H <sub>38</sub> O <sub>3</sub>                | 0.06 | 0.05 | 2.45  | 1.91 |
| 303.1431 | C <sub>12</sub> H <sub>21</sub> O <sub>6</sub> N <sub>3</sub> | 0.06 | 0.05 | 1.87  | 1.48 |
| 304.2278 | C <sub>19</sub> H <sub>30</sub> O <sub>2</sub> N              | 0.06 | 0.05 | 2.67  | 2.08 |
| 307.2625 | C <sub>18</sub> H <sub>33</sub> ON <sub>3</sub>               | 0.02 | 0.01 | 2.36  | 1.19 |
| 310.2145 | C <sub>18</sub> H <sub>30</sub> O <sub>4</sub>                | 0.04 | 0.03 | 1.42  | 1.65 |

|          |                                                               |      |      |       |      |
|----------|---------------------------------------------------------------|------|------|-------|------|
| 311.2938 | C <sub>18</sub> H <sub>37</sub> ON <sub>3</sub>               | 0.02 | 0.01 | 2.04  | 1.08 |
| 312.2666 | C <sub>19</sub> H <sub>36</sub> O <sub>3</sub>                | 0.01 | 0.01 | 1.88  | 0.39 |
| 312.3394 | C <sub>21</sub> H <sub>44</sub> O                             | 0.02 | 0.01 | 2.45  | 1.23 |
| 316.1887 | C <sub>16</sub> H <sub>28</sub> O <sub>6</sub>                | 0.04 | 0.03 | -1.11 | 2.11 |
| 316.2251 | C <sub>17</sub> H <sub>32</sub> O <sub>5</sub>                | 0.00 | 0.00 | 3.52  | 0.47 |
| 322.2874 | C <sub>21</sub> H <sub>38</sub> O <sub>2</sub>                | 0.03 | 0.03 | 1.80  | 1.25 |
| 325.2983 | C <sub>20</sub> H <sub>39</sub> O <sub>2</sub> N              | 0.02 | 0.01 | 2.13  | 1.19 |
| 336.1574 | C <sub>18</sub> H <sub>24</sub> O <sub>6</sub>                | 0.06 | 0.05 | 1.87  | 1.59 |
| 336.1938 | C <sub>19</sub> H <sub>28</sub> O <sub>5</sub>                | 0.02 | 0.01 | 2.81  | 1.48 |
| 337.2254 | C <sub>19</sub> H <sub>31</sub> O <sub>4</sub> N              | 0.06 | 0.05 | 1.87  | 1.46 |
| 338.2823 | C <sub>21</sub> H <sub>38</sub> O <sub>3</sub>                | 0.03 | 0.02 | 2.22  | 1.36 |
| 338.3187 | C <sub>22</sub> H <sub>42</sub> O <sub>2</sub>                | 0.03 | 0.02 | 2.50  | 1.48 |
| 339.2676 | C <sub>22</sub> H <sub>33</sub> N <sub>3</sub>                | 0.06 | 0.05 | 1.61  | 1.38 |
| 340.2615 | C <sub>20</sub> H <sub>36</sub> O <sub>4</sub>                | 0.06 | 0.04 | 0.28  | 1.65 |
| 340.2979 | C <sub>21</sub> H <sub>40</sub> O <sub>3</sub>                | 0.02 | 0.01 | 2.79  | 1.56 |
| 340.3343 | C <sub>22</sub> H <sub>44</sub> O <sub>2</sub>                | 0.01 | 0.01 | 2.57  | 0.21 |
| 341.2469 | C <sub>21</sub> H <sub>31</sub> ON <sub>3</sub>               | 0.06 | 0.05 | 1.72  | 1.36 |
| 341.2932 | C <sub>20</sub> H <sub>39</sub> O <sub>3</sub> N              | 0.02 | 0.01 | 2.24  | 1.16 |
| 347.2309 | C <sub>17</sub> H <sub>33</sub> O <sub>6</sub> N              | 0.06 | 0.05 | 1.66  | 1.31 |
| 352.3343 | C <sub>23</sub> H <sub>44</sub> O <sub>2</sub>                | 0.05 | 0.04 | 1.25  | 1.34 |
| 354.2772 | C <sub>21</sub> H <sub>38</sub> O <sub>4</sub>                | 0.04 | 0.05 | 2.09  | 1.31 |
| 354.3136 | C <sub>22</sub> H <sub>42</sub> O <sub>3</sub>                | 0.06 | 0.05 | 1.62  | 1.45 |
| 354.3500 | C <sub>23</sub> H <sub>46</sub> O <sub>2</sub>                | 0.06 | 0.05 | 1.72  | 1.68 |
| 366.3500 | C <sub>24</sub> H <sub>46</sub> O <sub>2</sub>                | 0.06 | 0.05 | 1.95  | 1.55 |
| 368.3293 | C <sub>23</sub> H <sub>44</sub> O <sub>3</sub>                | 0.03 | 0.02 | 2.15  | 1.24 |
| 376.2463 | C <sub>19</sub> H <sub>36</sub> O <sub>7</sub>                | 0.02 | 0.01 | 2.55  | 1.42 |
| 382.3813 | C <sub>25</sub> H <sub>50</sub> O <sub>2</sub>                | 0.06 | 0.05 | 1.61  | 1.30 |
| 384.2262 | C <sub>19</sub> H <sub>32</sub> O <sub>6</sub> N <sub>2</sub> | 0.05 | 0.02 | 1.20  | 1.30 |
| 386.3034 | C <sub>22</sub> H <sub>42</sub> O <sub>5</sub>                | 0.06 | 0.05 | 1.84  | 1.47 |
| 394.3449 | C <sub>25</sub> H <sub>46</sub> O <sub>3</sub>                | 0.04 | 0.03 | 1.21  | 1.16 |
| 396.3242 | C <sub>24</sub> H <sub>44</sub> O <sub>4</sub>                | 0.03 | 0.03 | 1.98  | 1.20 |

39 Table S3. The fragment ions from AMS with p-value smaller than 0.1 during pairwise comparisons and their fold changes  
40 in 5 types of burning.

| Burning types               | <i>m/z</i> | Formula                          | <i>p</i> _mean | <i>p</i> _std | log <sub>2</sub> FC_mean | log <sub>2</sub> FC_std |
|-----------------------------|------------|----------------------------------|----------------|---------------|--------------------------|-------------------------|
|                             | 16.0313    | C                                | 0.05           | 0.04          | 0.70                     | 0.42                    |
|                             | 24.0000    | C <sub>2</sub>                   | 0.04           | 0.05          | -0.11                    | 0.23                    |
|                             | 30.0106    | CH <sub>2</sub> O                | 0.03           | 0.03          | -0.03                    | 0.34                    |
| Beech logs stove<br>burning | 30.0344    | CH <sub>4</sub> ON               | 0.03           | 0.02          | -1.83                    | 0.72                    |
|                             | 42.0344    | C <sub>2</sub> H <sub>4</sub> ON | 0.02           | 0.02          | -0.42                    | 0.68                    |
|                             | 43.0422    | C <sub>2</sub> H <sub>5</sub> ON | 0.04           | 0.03          | -0.11                    | 0.99                    |
|                             | 51.0235    | C <sub>4</sub> H <sub>3</sub>    | 0.03           | 0.03          | 0.35                     | 0.21                    |
|                             | 52.0313    | C <sub>4</sub> H <sub>4</sub>    | 0.03           | 0.03          | 0.38                     | 0.24                    |

|                            |                                              |                                  |      |       |       |      |
|----------------------------|----------------------------------------------|----------------------------------|------|-------|-------|------|
| 53.0027                    | C <sub>3</sub> HO                            | 0.05                             | 0.03 | 0.45  | 0.46  |      |
| 54.0344                    | C <sub>3</sub> H <sub>4</sub> ON             | 0.04                             | 0.05 | -0.60 | 0.74  |      |
| 55.0422                    | C <sub>3</sub> H <sub>5</sub> ON             | 0.01                             | 0.00 | -0.42 | 0.92  |      |
| 55.9898                    | C <sub>2</sub> O <sub>2</sub>                | 0.06                             | 0.05 | -0.28 | 0.37  |      |
| 56.0501                    | C <sub>3</sub> H <sub>6</sub> ON             | 0.05                             | 0.04 | -0.78 | 0.87  |      |
| 57.0579                    | C <sub>3</sub> H <sub>7</sub> ON             | 0.01                             | 0.01 | -0.03 | 0.49  |      |
| 59.0497                    | C <sub>3</sub> H <sub>7</sub> O              | 0.01                             | 0.01 | -0.46 | 0.19  |      |
| 63.9949                    | C <sub>4</sub> O                             | 0.01                             | 0.01 | 0.24  | 0.14  |      |
| 64.0313                    | C <sub>5</sub> H <sub>4</sub>                | 0.03                             | 0.03 | 0.45  | 0.31  |      |
| 66.0106                    | C <sub>4</sub> H <sub>2</sub> O              | 0.02                             | 0.02 | 0.72  | 0.43  |      |
| 67.0184                    | C <sub>4</sub> H <sub>3</sub> O              | 0.03                             | 0.01 | 0.69  | 0.48  |      |
| 68.0501                    | C <sub>4</sub> H <sub>6</sub> ON             | 0.08                             | 0.02 | -1.58 | 0.71  |      |
| 70.0055                    | C <sub>3</sub> H <sub>2</sub> O <sub>2</sub> | 0.05                             | 0.04 | -0.30 | 0.28  |      |
| 71.0735                    | C <sub>4</sub> H <sub>9</sub> ON             | 0.03                             | 0.03 | -0.01 | 0.51  |      |
| 77.0027                    | C <sub>5</sub> HO                            | 0.05                             | 0.05 | 0.67  | 0.36  |      |
| 79.0184                    | C <sub>5</sub> H <sub>3</sub> O              | 0.04                             | 0.02 | 0.69  | 0.71  |      |
| 89.0392                    | C <sub>7</sub> H <sub>5</sub>                | 0.04                             | 0.03 | 0.32  | 0.28  |      |
| 91.0031                    | C <sub>2</sub> H <sub>3</sub> O <sub>4</sub> | 0.05                             | 0.04 | 0.55  | 0.39  |      |
| 92.9977                    | C <sub>5</sub> HO <sub>2</sub>               | 0.01                             | 0.00 | 0.24  | 0.19  |      |
| 93.0341                    | C <sub>6</sub> H <sub>5</sub> O              | 0.06                             | 0.03 | 0.74  | 1.11  |      |
| 97.0654                    | C <sub>6</sub> H <sub>9</sub> O              | 0.01                             | 0.01 | -1.15 | 0.78  |      |
| 99.0685                    | C <sub>5</sub> H <sub>9</sub> ON             | 0.04                             | 0.04 | -0.14 | 0.32  |      |
| 101.0239                   | C <sub>4</sub> H <sub>5</sub> O <sub>3</sub> | 0.04                             | 0.04 | -0.21 | 0.44  |      |
| 102.0106                   | C <sub>7</sub> H <sub>2</sub> O              | 0.02                             | 0.04 | 0.69  | 0.08  |      |
| 102.0470                   | C <sub>8</sub> H <sub>6</sub>                | 0.01                             | 0.02 | 0.45  | 0.23  |      |
| 106.0419                   | C <sub>7</sub> H <sub>6</sub> O              | 0.06                             | 0.01 | 0.44  | 0.80  |      |
| 108.0211                   | C <sub>6</sub> H <sub>4</sub> O <sub>2</sub> | 0.06                             | 0.03 | 0.51  | 0.68  |      |
| 111.0810                   | C <sub>7</sub> H <sub>11</sub> O             | 0.03                             | 0.03 | -1.16 | 0.67  |      |
| 111.1175                   | C <sub>8</sub> H <sub>15</sub>               | 0.06                             | 0.04 | -0.40 | 0.71  |      |
| <hr/>                      |                                              |                                  |      |       |       |      |
| Spruce and pine<br>burning | 15.9949                                      | O                                | 0.01 | 0.01  | 0.71  | 0.15 |
|                            | 24.0000                                      | C <sub>2</sub>                   | 0.00 | 0.00  | 0.74  | 0.18 |
|                            | 25.0078                                      | C <sub>2</sub> H                 | 0.02 | 0.02  | -0.13 | 0.03 |
|                            | 26.0031                                      | CN                               | 0.00 | 0.00  | -1.28 | 0.47 |
|                            | 26.0157                                      | C <sub>2</sub> H <sub>2</sub>    | 0.00 | 0.00  | 0.41  | 0.14 |
|                            | 27.0109                                      | CHON                             | 0.03 | 0.02  | -0.70 | 0.50 |
|                            | 27.9949                                      | CO                               | 0.01 | 0.01  | 0.64  | 0.18 |
|                            | 30.0106                                      | CH <sub>2</sub> O                | 0.00 | 0.00  | 0.95  | 0.22 |
|                            | 33.0335                                      | CH <sub>3</sub> O                | 0.00 | 0.00  | 0.87  | 0.12 |
|                            | 36.0000                                      | C <sub>3</sub>                   | 0.00 | 0.00  | 1.18  | 0.15 |
|                            | 39.0109                                      | C <sub>2</sub> HON               | 0.00 | 0.00  | -6.03 | 0.45 |
|                            | 39.9949                                      | C <sub>2</sub> O                 | 0.03 | 0.04  | 1.26  | 0.79 |
|                            | 41.9980                                      | CON                              | 0.00 | 0.00  | -2.49 | 0.12 |
|                            | 42.0344                                      | C <sub>2</sub> H <sub>4</sub> ON | 0.00 | 0.00  | -2.38 | 0.69 |

|         |                                              |      |      |       |      |
|---------|----------------------------------------------|------|------|-------|------|
| 43.0058 | CHON                                         | 0.00 | 0.00 | -4.00 | 0.37 |
| 43.0422 | C <sub>2</sub> H <sub>5</sub> ON             | 0.00 | 0.00 | -4.33 | 0.37 |
| 43.9898 | CO <sub>2</sub>                              | 0.01 | 0.01 | 0.89  | 0.18 |
| 44.0262 | C <sub>2</sub> H <sub>4</sub> O              | 0.01 | 0.01 | 0.86  | 0.20 |
| 44.0626 | C <sub>3</sub> H <sub>8</sub>                | 0.01 | 0.01 | -1.24 | 0.19 |
| 46.0055 | CH <sub>2</sub> O <sub>2</sub>               | 0.00 | 0.01 | -0.37 | 0.02 |
| 47.0133 | CH <sub>3</sub> O <sub>2</sub>               | 0.00 | 0.00 | 0.84  | 0.21 |
| 48.0000 | C <sub>4</sub>                               | 0.00 | 0.00 | 0.53  | 0.16 |
| 48.0211 | CH <sub>4</sub> O <sub>2</sub>               | 0.00 | 0.00 | 0.26  | 0.06 |
| 49.0290 | CH <sub>5</sub> O <sub>2</sub>               | 0.02 | 0.02 | 0.24  | 0.09 |
| 51.0109 | C <sub>3</sub> HON                           | 0.00 | 0.00 | -1.83 | 0.34 |
| 52.0061 | C <sub>2</sub> N <sub>2</sub>                | 0.02 | 0.01 | -0.67 | 0.10 |
| 52.0187 | C <sub>3</sub> H <sub>2</sub> ON             | 0.02 | 0.00 | -1.43 | 0.55 |
| 53.0266 | C <sub>3</sub> H <sub>3</sub> ON             | 0.00 | 0.00 | -1.57 | 0.52 |
| 53.0392 | C <sub>4</sub> H <sub>5</sub>                | 0.01 | 0.01 | -0.22 | 0.11 |
| 53.9980 | C <sub>2</sub> ON                            | 0.00 | 0.00 | -1.20 | 0.05 |
| 54.0344 | C <sub>3</sub> H <sub>4</sub> ON             | 0.00 | 0.00 | -2.39 | 0.61 |
| 55.0184 | C <sub>3</sub> H <sub>3</sub> O              | 0.04 | 0.04 | 0.31  | 0.16 |
| 55.0184 | C <sub>3</sub> H <sub>3</sub> O              | 0.00 | 0.01 | -0.28 | 0.03 |
| 55.0422 | C <sub>3</sub> H <sub>5</sub> ON             | 0.00 | 0.00 | -3.26 | 0.70 |
| 55.9898 | C <sub>2</sub> O <sub>2</sub>                | 0.00 | 0.00 | 0.97  | 0.26 |
| 56.0136 | C <sub>2</sub> H <sub>2</sub> ON             | 0.00 | 0.00 | -1.76 | 0.12 |
| 56.0262 | C <sub>3</sub> H <sub>4</sub> O              | 0.00 | 0.00 | 0.98  | 0.19 |
| 56.0501 | C <sub>3</sub> H <sub>6</sub> ON             | 0.00 | 0.01 | -2.25 | 0.49 |
| 56.0626 | C <sub>4</sub> H <sub>8</sub>                | 0.06 | 0.02 | -0.15 | 0.08 |
| 56.9977 | C <sub>2</sub> HO <sub>2</sub>               | 0.03 | 0.04 | 0.22  | 0.08 |
| 56.9977 | C <sub>2</sub> HO <sub>2</sub>               | 0.00 | 0.00 | -0.17 | 0.02 |
| 57.0215 | C <sub>2</sub> H <sub>3</sub> ON             | 0.00 | 0.00 | -2.85 | 0.43 |
| 57.0341 | C <sub>3</sub> H <sub>5</sub> O              | 0.00 | 0.00 | 0.75  | 0.20 |
| 57.0579 | C <sub>3</sub> H <sub>7</sub> ON             | 0.00 | 0.00 | -3.39 | 0.66 |
| 58.0055 | C <sub>2</sub> H <sub>2</sub> O <sub>2</sub> | 0.00 | 0.00 | 1.30  | 0.29 |
| 59.0007 | CHO <sub>2</sub> N                           | 0.01 | 0.01 | -0.40 | 0.09 |
| 60.0000 | C <sub>5</sub>                               | 0.02 | 0.02 | -1.09 | 0.01 |
| 60.0086 | CH <sub>2</sub> O <sub>2</sub> N             | 0.01 | 0.02 | -1.86 | 0.29 |
| 60.0211 | C <sub>2</sub> H <sub>4</sub> O <sub>2</sub> | 0.01 | 0.01 | 0.82  | 0.22 |
| 60.0450 | C <sub>2</sub> H <sub>6</sub> ON             | 0.01 | 0.01 | 1.32  | 0.62 |
| 60.9926 | CHO <sub>3</sub>                             | 0.01 | 0.01 | -0.61 | 0.07 |
| 61.0164 | CH <sub>3</sub> O <sub>2</sub> N             | 0.00 | 0.00 | -1.90 | 0.20 |
| 61.0290 | C <sub>2</sub> H <sub>5</sub> O <sub>2</sub> | 0.00 | 0.00 | 0.60  | 0.16 |
| 62.0004 | CH <sub>2</sub> O <sub>3</sub>               | 0.00 | 0.00 | -0.44 | 0.01 |
| 63.0235 | C <sub>5</sub> H <sub>3</sub>                | 0.00 | 0.00 | -0.35 | 0.18 |
| 63.0320 | CH <sub>5</sub> O <sub>2</sub> N             | 0.00 | 0.00 | -1.46 | 0.42 |
| 64.0187 | C <sub>4</sub> H <sub>2</sub> ON             | 0.00 | 0.00 | -1.06 | 0.22 |

|         |                                                |      |      |       |      |
|---------|------------------------------------------------|------|------|-------|------|
| 64.0313 | C <sub>5</sub> H <sub>4</sub>                  | 0.01 | 0.02 | -0.38 | 0.16 |
| 65.0027 | C <sub>4</sub> HO                              | 0.00 | 0.00 | -0.68 | 0.10 |
| 65.0392 | C <sub>5</sub> H <sub>5</sub>                  | 0.00 | 0.00 | -0.47 | 0.12 |
| 66.0470 | C <sub>5</sub> H <sub>6</sub>                  | 0.00 | 0.00 | -0.52 | 0.11 |
| 67.0058 | C <sub>3</sub> HON                             | 0.00 | 0.00 | -1.14 | 0.17 |
| 67.0296 | C <sub>3</sub> H <sub>3</sub> N <sub>2</sub>   | 0.01 | 0.01 | -1.88 | 0.07 |
| 68.0136 | C <sub>3</sub> H <sub>2</sub> ON               | 0.00 | 0.00 | -0.98 | 0.18 |
| 70.0055 | C <sub>3</sub> H <sub>2</sub> O <sub>2</sub>   | 0.00 | 0.00 | 0.90  | 0.23 |
| 70.0419 | C <sub>4</sub> H <sub>6</sub> O                | 0.00 | 0.00 | 0.63  | 0.18 |
| 70.0657 | C <sub>4</sub> H <sub>8</sub> ON               | 0.01 | 0.02 | -1.72 | 0.50 |
| 71.0007 | C <sub>2</sub> HO <sub>2</sub> N               | 0.00 | 0.00 | -1.26 | 0.17 |
| 71.0133 | C <sub>3</sub> H <sub>3</sub> O <sub>2</sub>   | 0.00 | 0.00 | 1.01  | 0.21 |
| 71.0371 | C <sub>3</sub> H <sub>5</sub> ON               | 0.00 | 0.00 | -1.35 | 0.21 |
| 71.0497 | C <sub>4</sub> H <sub>7</sub> O                | 0.02 | 0.04 | 0.59  | 0.12 |
| 71.0735 | C <sub>4</sub> H <sub>9</sub> ON               | 0.00 | 0.00 | -3.23 | 0.14 |
| 72.0211 | C <sub>3</sub> H <sub>4</sub> O <sub>2</sub>   | 0.00 | 0.00 | 1.33  | 0.25 |
| 72.0450 | C <sub>3</sub> H <sub>6</sub> ON               | 0.01 | 0.01 | -1.13 | 0.19 |
| 72.0814 | C <sub>4</sub> H <sub>10</sub> ON              | 0.00 | 0.00 | -0.60 | 0.10 |
| 73.0290 | C <sub>3</sub> H <sub>5</sub> O <sub>2</sub>   | 0.00 | 0.00 | 0.69  | 0.18 |
| 73.0892 | C <sub>4</sub> H <sub>11</sub> ON              | 0.00 | 0.00 | -0.85 | 0.08 |
| 74.0368 | C <sub>3</sub> H <sub>6</sub> O <sub>2</sub>   | 0.00 | 0.00 | 0.53  | 0.20 |
| 74.0606 | C <sub>3</sub> H <sub>8</sub> ON               | 0.00 | 0.00 | 0.32  | 0.15 |
| 75.0082 | C <sub>2</sub> H <sub>3</sub> O <sub>3</sub>   | 0.01 | 0.00 | -0.52 | 0.18 |
| 75.9949 | C <sub>5</sub> O                               | 0.00 | 0.00 | -0.28 | 0.02 |
| 77.0027 | C <sub>5</sub> HO                              | 0.01 | 0.02 | -0.81 | 0.23 |
| 77.0392 | C <sub>6</sub> H <sub>5</sub>                  | 0.03 | 0.03 | -0.24 | 0.20 |
| 77.0603 | C <sub>3</sub> H <sub>9</sub> O <sub>2</sub>   | 0.00 | 0.00 | -1.08 | 0.58 |
| 78.0106 | C <sub>5</sub> H <sub>2</sub> O                | 0.00 | 0.00 | -0.85 | 0.15 |
| 79.0422 | C <sub>5</sub> H <sub>5</sub> ON               | 0.00 | 0.00 | 0.98  | 0.64 |
| 80.9977 | C <sub>4</sub> HO <sub>2</sub>                 | 0.00 | 0.00 | -0.55 | 0.08 |
| 81.0453 | C <sub>4</sub> H <sub>5</sub> N <sub>2</sub>   | 0.00 | 0.01 | -1.98 | 0.12 |
| 82.0531 | C <sub>4</sub> H <sub>6</sub> N <sub>2</sub>   | 0.00 | 0.00 | -2.01 | 0.16 |
| 83.0133 | C <sub>4</sub> H <sub>3</sub> O <sub>2</sub>   | 0.00 | 0.00 | 0.86  | 0.24 |
| 84.0450 | C <sub>4</sub> H <sub>6</sub> ON               | 0.01 | 0.01 | -0.69 | 0.22 |
| 84.0814 | C <sub>5</sub> H <sub>10</sub> ON              | 0.00 | 0.00 | -1.01 | 0.21 |
| 85.0528 | C <sub>4</sub> H <sub>7</sub> ON               | 0.00 | 0.00 | -1.19 | 0.33 |
| 85.0654 | C <sub>5</sub> H <sub>9</sub> O                | 0.00 | 0.00 | 1.59  | 0.31 |
| 85.0892 | C <sub>5</sub> H <sub>11</sub> ON              | 0.01 | 0.01 | -1.97 | 0.22 |
| 86.0116 | C <sub>2</sub> H <sub>2</sub> O <sub>2</sub> N | 0.01 | 0.01 | -0.96 | 0.44 |
| 86.0157 | C <sub>7</sub> H <sub>2</sub>                  | 0.00 | 0.00 | 1.76  | 0.29 |
| 86.0732 | C <sub>5</sub> H <sub>10</sub> O               | 0.00 | 0.00 | -2.45 | 0.07 |
| 87.9796 | C <sub>2</sub> O <sub>4</sub>                  | 0.03 | 0.01 | -0.04 | 0.02 |
| 89.0027 | C <sub>6</sub> HO                              | 0.01 | 0.01 | -0.15 | 0.02 |

|          |                                                |      |      |       |      |
|----------|------------------------------------------------|------|------|-------|------|
| 89.0113  | C <sub>2</sub> H <sub>3</sub> O <sub>3</sub> N | 0.03 | 0.04 | -0.75 | 0.06 |
| 89.0239  | C <sub>3</sub> H <sub>5</sub> O <sub>3</sub>   | 0.00 | 0.00 | 1.67  | 0.24 |
| 89.0392  | C <sub>7</sub> H <sub>5</sub>                  | 0.05 | 0.05 | -0.25 | 0.16 |
| 89.0603  | C <sub>4</sub> H <sub>9</sub> O <sub>2</sub>   | 0.07 | 0.02 | -0.59 | 0.34 |
| 90.0470  | C <sub>7</sub> H <sub>6</sub>                  | 0.01 | 0.01 | -0.39 | 0.14 |
| 91.0395  | C <sub>3</sub> H <sub>7</sub> O <sub>3</sub>   | 0.00 | 0.00 | 1.87  | 0.52 |
| 92.0110  | C <sub>2</sub> H <sub>4</sub> O <sub>4</sub>   | 0.00 | 0.00 | -0.98 | 0.11 |
| 92.0348  | C <sub>2</sub> H <sub>6</sub> O <sub>3</sub> N | 0.01 | 0.01 | -1.56 | 0.12 |
| 92.0474  | C <sub>3</sub> H <sub>8</sub> O <sub>3</sub>   | 0.01 | 0.02 | 0.77  | 0.35 |
| 93.0552  | C <sub>3</sub> H <sub>9</sub> O <sub>3</sub>   | 0.00 | 0.00 | 0.83  | 0.54 |
| 94.0055  | C <sub>5</sub> H <sub>2</sub> O <sub>2</sub>   | 0.01 | 0.01 | -0.44 | 0.05 |
| 94.0266  | C <sub>2</sub> H <sub>6</sub> O <sub>4</sub>   | 0.01 | 0.02 | 0.83  | 0.16 |
| 95.0610  | C <sub>5</sub> H <sub>7</sub> N <sub>2</sub>   | 0.01 | 0.01 | -1.36 | 0.15 |
| 96.0000  | C <sub>8</sub>                                 | 0.02 | 0.02 | -0.34 | 0.00 |
| 96.0211  | C <sub>5</sub> H <sub>4</sub> O <sub>2</sub>   | 0.01 | 0.01 | 0.84  | 0.24 |
| 96.0324  | C <sub>4</sub> H <sub>4</sub> ON               | 0.01 | 0.01 | -1.49 | 0.02 |
| 97.0078  | C <sub>8</sub> H                               | 0.00 | 0.00 | -0.46 | 0.16 |
| 97.0290  | C <sub>5</sub> H <sub>5</sub> O <sub>2</sub>   | 0.01 | 0.01 | 0.80  | 0.21 |
| 97.0402  | C <sub>4</sub> H <sub>5</sub> ON               | 0.00 | 0.00 | -1.46 | 0.26 |
| 98.0004  | C <sub>4</sub> H <sub>2</sub> O <sub>3</sub>   | 0.00 | 0.01 | -0.47 | 0.07 |
| 98.0368  | C <sub>5</sub> H <sub>6</sub> O <sub>2</sub>   | 0.00 | 0.00 | 0.73  | 0.21 |
| 99.0235  | C <sub>8</sub> H <sub>3</sub>                  | 0.02 | 0.02 | 0.42  | 0.20 |
| 99.0446  | C <sub>5</sub> H <sub>7</sub> O <sub>2</sub>   | 0.02 | 0.04 | 0.61  | 0.17 |
| 99.0685  | C <sub>5</sub> H <sub>9</sub> ON               | 0.03 | 0.05 | -0.60 | 0.24 |
| 99.0810  | C <sub>6</sub> H <sub>11</sub> O               | 0.01 | 0.01 | 0.65  | 0.24 |
| 100.0161 | C <sub>4</sub> H <sub>4</sub> O <sub>3</sub>   | 0.02 | 0.01 | 0.30  | 0.15 |
| 100.0399 | C <sub>4</sub> H <sub>6</sub> O <sub>2</sub> N | 0.01 | 0.01 | -1.09 | 0.23 |
| 100.0637 | C <sub>4</sub> H <sub>8</sub> ON               | 0.01 | 0.01 | -0.59 | 0.21 |
| 100.1253 | C <sub>7</sub> H <sub>16</sub>                 | 0.00 | 0.00 | -0.09 | 0.03 |
| 101.0239 | C <sub>4</sub> H <sub>5</sub> O <sub>3</sub>   | 0.00 | 0.00 | 0.96  | 0.22 |
| 101.0392 | C <sub>8</sub> H <sub>5</sub>                  | 0.00 | 0.01 | 0.78  | 0.19 |
| 101.0477 | C <sub>4</sub> H <sub>7</sub> O <sub>2</sub> N | 0.00 | 0.00 | -2.16 | 0.39 |
| 102.0106 | C <sub>7</sub> H <sub>2</sub> O                | 0.00 | 0.00 | -0.77 | 0.05 |
| 102.0317 | C <sub>4</sub> H <sub>6</sub> O <sub>3</sub>   | 0.00 | 0.00 | 1.53  | 0.21 |
| 102.0470 | C <sub>8</sub> H <sub>6</sub>                  | 0.00 | 0.00 | -0.43 | 0.17 |
| 103.0184 | C <sub>7</sub> H <sub>3</sub> O                | 0.01 | 0.01 | -0.61 | 0.14 |
| 103.0548 | C <sub>8</sub> H <sub>7</sub>                  | 0.01 | 0.01 | -0.29 | 0.20 |
| 104.0348 | C <sub>3</sub> H <sub>6</sub> O <sub>3</sub> N | 0.02 | 0.01 | -0.98 | 0.12 |
| 105.0188 | C <sub>3</sub> H <sub>5</sub> O <sub>4</sub>   | 0.00 | 0.00 | -1.20 | 0.25 |
| 105.0552 | C <sub>4</sub> H <sub>9</sub> O <sub>3</sub>   | 0.00 | 0.00 | 1.16  | 0.62 |
| 106.0055 | C <sub>6</sub> H <sub>2</sub> O <sub>2</sub>   | 0.00 | 0.00 | -0.25 | 0.02 |
| 108.0000 | C <sub>9</sub>                                 | 0.02 | 0.03 | -0.22 | 0.08 |
| 108.0576 | C <sub>7</sub> H <sub>8</sub> O                | 0.04 | 0.02 | -0.36 | 0.22 |

|                       |                                                 |                                              |      |       |       |      |
|-----------------------|-------------------------------------------------|----------------------------------------------|------|-------|-------|------|
| 109.0078              | C <sub>9</sub> H                                | 0.00                                         | 0.00 | -0.47 | 0.09  |      |
| 109.0528              | C <sub>6</sub> H <sub>7</sub> ON                | 0.00                                         | 0.00 | -1.29 | 0.15  |      |
| 110.0606              | C <sub>6</sub> H <sub>8</sub> ON                | 0.00                                         | 0.00 | -1.66 | 0.25  |      |
| 111.0685              | C <sub>6</sub> H <sub>9</sub> ON                | 0.00                                         | 0.00 | -1.48 | 0.27  |      |
| 111.1175              | C <sub>8</sub> H <sub>15</sub>                  | 0.03                                         | 0.05 | -1.36 | 0.27  |      |
| 112.0161              | C <sub>5</sub> H <sub>4</sub> O <sub>3</sub>    | 0.00                                         | 0.00 | 0.81  | 0.25  |      |
| 112.0637              | C <sub>5</sub> H <sub>8</sub> ON                | 0.00                                         | 0.00 | -0.95 | 0.05  |      |
| 113.0239              | C <sub>5</sub> H <sub>5</sub> O <sub>3</sub>    | 0.02                                         | 0.01 | 0.49  | 0.21  |      |
| 113.0967              | C <sub>7</sub> H <sub>13</sub> O                | 0.01                                         | 0.01 | 0.41  | 0.19  |      |
| 113.1331              | C <sub>8</sub> H <sub>17</sub>                  | 0.02                                         | 0.03 | -0.90 | 0.48  |      |
| 114.0317              | C <sub>5</sub> H <sub>6</sub> O <sub>3</sub>    | 0.00                                         | 0.00 | 0.75  | 0.17  |      |
| 114.0470              | C <sub>9</sub> H <sub>6</sub>                   | 0.01                                         | 0.01 | -0.45 | 0.20  |      |
| 114.1409              | C <sub>8</sub> H <sub>18</sub>                  | 0.00                                         | 0.00 | -0.13 | 0.03  |      |
| 115.0031              | C <sub>4</sub> H <sub>3</sub> O <sub>4</sub>    | 0.00                                         | 0.00 | -0.62 | 0.03  |      |
| 115.0395              | C <sub>5</sub> H <sub>7</sub> O <sub>3</sub>    | 0.00                                         | 0.00 | 2.93  | 0.19  |      |
| 115.0760              | C <sub>6</sub> H <sub>11</sub> O <sub>2</sub>   | 0.01                                         | 0.01 | -1.23 | 0.71  |      |
| 116.0110              | C <sub>4</sub> H <sub>4</sub> O <sub>4</sub>    | 0.00                                         | 0.00 | -0.37 | 0.07  |      |
| 116.0474              | C <sub>5</sub> H <sub>8</sub> O <sub>3</sub>    | 0.00                                         | 0.00 | 1.81  | 0.46  |      |
| 116.0586              | C <sub>4</sub> H <sub>8</sub> O <sub>2</sub> N  | 0.00                                         | 0.00 | 2.20  | 0.55  |      |
| 116.0626              | C <sub>9</sub> H <sub>8</sub>                   | 0.00                                         | 0.00 | -0.85 | 0.40  |      |
| 117.0552              | C <sub>5</sub> H <sub>9</sub> O <sub>3</sub>    | 0.00                                         | 0.00 | 1.76  | 0.36  |      |
| 117.9902              | C <sub>3</sub> H <sub>2</sub> O <sub>5</sub>    | 0.00                                         | 0.00 | -0.09 | 0.03  |      |
| 118.0419              | C <sub>8</sub> H <sub>6</sub> O                 | 0.00                                         | 0.00 | 1.44  | 0.31  |      |
| 118.0630              | C <sub>5</sub> H <sub>10</sub> O <sub>3</sub>   | 0.00                                         | 0.00 | -1.79 | 0.19  |      |
| 118.0743              | C <sub>4</sub> H <sub>10</sub> O <sub>2</sub> N | 0.00                                         | 0.00 | 2.26  | 0.41  |      |
| 118.9980              | C <sub>3</sub> H <sub>3</sub> O <sub>5</sub>    | 0.02                                         | 0.03 | 0.10  | 0.07  |      |
| 119.0709              | C <sub>5</sub> H <sub>11</sub> O <sub>3</sub>   | 0.00                                         | 0.00 | 0.94  | 0.51  |      |
| 120.0576              | C <sub>8</sub> H <sub>8</sub> O                 | 0.03                                         | 0.04 | -0.90 | 0.31  |      |
| <hr/>                 |                                                 |                                              |      |       |       |      |
| Straw open burning    | 36.0000                                         | C <sub>3</sub>                               | 0.02 | 0.04  | -2.42 | 0.36 |
|                       | 58.0419                                         | C <sub>3</sub> H <sub>6</sub> O              | 0.02 | 0.03  | 0.35  | 0.24 |
|                       | 58.0657                                         | C <sub>3</sub> H <sub>8</sub> ON             | 0.05 | 0.04  | 0.84  | 0.78 |
|                       | 59.0735                                         | C <sub>3</sub> H <sub>9</sub> ON             | 0.07 | 0.02  | 0.50  | 0.63 |
|                       | 100.0525                                        | C <sub>5</sub> H <sub>8</sub> O <sub>2</sub> | 0.06 | 0.03  | 0.61  | 0.86 |
|                       | 120.0576                                        | C <sub>8</sub> H <sub>8</sub> O              | 0.04 | 0.04  | 0.81  | 0.47 |
| <hr/>                 |                                                 |                                              |      |       |       |      |
| Cow dung open burning | 13.0078                                         | CH                                           | 0.01 | 0.02  | -1.06 | 0.45 |
|                       | 15.0235                                         | CH <sub>3</sub>                              | 0.02 | 0.03  | -1.01 | 0.42 |
|                       | 15.9949                                         | O                                            | 0.01 | 0.02  | -0.98 | 0.26 |
|                       | 17.0027                                         | HO                                           | 0.01 | 0.02  | -1.28 | 0.39 |
|                       | 18.0106                                         | H <sub>2</sub> O                             | 0.01 | 0.02  | -1.35 | 0.41 |
|                       | 27.9949                                         | CO                                           | 0.03 | 0.04  | -1.21 | 0.49 |
|                       | 29.0392                                         | C <sub>2</sub> H <sub>5</sub>                | 0.03 | 0.05  | 0.48  | 0.17 |
|                       | 30.0470                                         | C <sub>2</sub> H <sub>6</sub>                | 0.03 | 0.04  | -1.15 | 0.64 |
| 41.0027               | C <sub>2</sub> HO                               | 0.04                                         | 0.04 | -1.13 | 0.69  |      |



|          |                                              |      |      |       |      |
|----------|----------------------------------------------|------|------|-------|------|
| 41.0266  | C <sub>2</sub> H <sub>3</sub> N              | 0.04 | 0.04 | 1.86  | 0.64 |
| 43.0184  | C <sub>2</sub> H <sub>3</sub> O              | 0.03 | 0.02 | -0.76 | 0.47 |
| 43.9898  | CO <sub>2</sub>                              | 0.01 | 0.02 | -1.36 | 0.42 |
| 51.9949  | C <sub>3</sub> O                             | 0.06 | 0.04 | -0.49 | 0.36 |
| 53.0027  | C <sub>3</sub> HO                            | 0.03 | 0.02 | -0.67 | 0.39 |
| 59.0371  | C <sub>2</sub> H <sub>5</sub> ON             | 0.06 | 0.02 | 1.73  | 1.34 |
| 64.0187  | C <sub>4</sub> H <sub>2</sub> ON             | 0.06 | 0.05 | 0.95  | 0.69 |
| 68.9977  | C <sub>3</sub> HO <sub>2</sub>               | 0.04 | 0.01 | -1.43 | 1.11 |
| 70.0657  | C <sub>4</sub> H <sub>8</sub> ON             | 0.01 | 0.01 | 1.47  | 0.58 |
| 72.0450  | C <sub>3</sub> H <sub>6</sub> ON             | 0.03 | 0.03 | 1.32  | 0.71 |
| 72.0814  | C <sub>4</sub> H <sub>10</sub> ON            | 0.02 | 0.03 | 0.85  | 0.41 |
| 80.0501  | C <sub>5</sub> H <sub>6</sub> ON             | 0.02 | 0.01 | 1.43  | 0.74 |
| 83.0133  | C <sub>4</sub> H <sub>3</sub> O <sub>2</sub> | 0.03 | 0.05 | -1.37 | 0.61 |
| 85.0290  | C <sub>4</sub> H <sub>5</sub> O <sub>2</sub> | 0.03 | 0.03 | -1.29 | 0.72 |
| 86.0606  | C <sub>4</sub> H <sub>8</sub> ON             | 0.05 | 0.03 | 0.41  | 0.41 |
| 86.0970  | C <sub>5</sub> H <sub>12</sub> ON            | 0.03 | 0.04 | 0.75  | 0.48 |
| 92.0110  | C <sub>2</sub> H <sub>4</sub> O <sub>4</sub> | 0.03 | 0.04 | -0.21 | 0.25 |
| 92.0626  | C <sub>7</sub> H <sub>8</sub>                | 0.04 | 0.04 | 0.62  | 0.41 |
| 93.0705  | C <sub>7</sub> H <sub>9</sub>                | 0.03 | 0.04 | 0.63  | 0.30 |
| 100.0889 | C <sub>6</sub> H <sub>12</sub> O             | 0.03 | 0.00 | 0.36  | 0.27 |
| 103.9898 | C <sub>6</sub> O <sub>2</sub>                | 0.04 | 0.04 | 0.13  | 0.08 |
| 105.0341 | C <sub>7</sub> H <sub>5</sub> O              | 0.04 | 0.04 | -1.59 | 0.85 |
| 105.0705 | C <sub>8</sub> H <sub>9</sub>                | 0.02 | 0.01 | 0.54  | 0.24 |
| 106.0783 | C <sub>8</sub> H <sub>10</sub>               | 0.03 | 0.04 | 0.72  | 0.38 |
| 107.0861 | C <sub>8</sub> H <sub>11</sub>               | 0.03 | 0.04 | 0.71  | 0.36 |
| 108.0211 | C <sub>6</sub> H <sub>4</sub> O <sub>2</sub> | 0.03 | 0.02 | -0.79 | 0.42 |
| 111.0810 | C <sub>7</sub> H <sub>11</sub> O             | 0.02 | 0.01 | 0.79  | 0.54 |
| 112.0763 | C <sub>6</sub> H <sub>10</sub> ON            | 0.04 | 0.02 | 0.49  | 0.36 |
| 115.0031 | C <sub>4</sub> H <sub>3</sub> O <sub>4</sub> | 0.02 | 0.02 | -0.07 | 0.32 |
| 116.0110 | C <sub>4</sub> H <sub>4</sub> O <sub>4</sub> | 0.03 | 0.04 | 0.07  | 0.04 |
| 119.0861 | C <sub>9</sub> H <sub>11</sub>               | 0.01 | 0.01 | 0.61  | 0.20 |
| 120.0940 | C <sub>9</sub> H <sub>12</sub>               | 0.04 | 0.04 | 0.60  | 0.32 |

---
